# Supplementary material for: Upregulation of DARS2 by HBV promotes hepatocarcinogenesis through the miR-30e-5p/MAPK/NFAT5 pathway
Source: Springer Nature journal article supplement (doi:10.1186/s13046-017-0618-x), 2017-10-19

# Additional file 2: Figure S2

## A

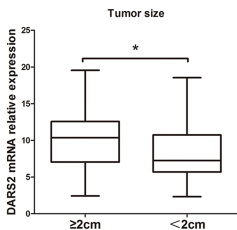

## B

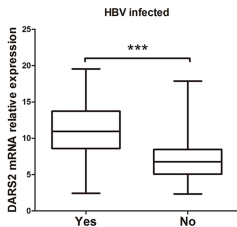

## C

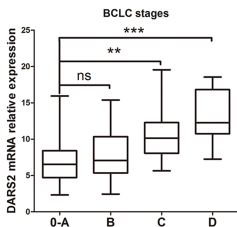

## D

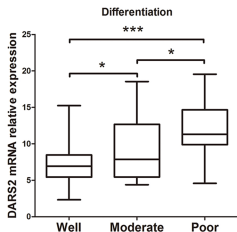

## E

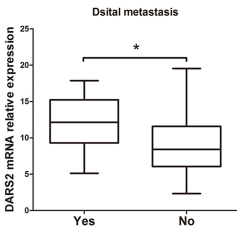

## F

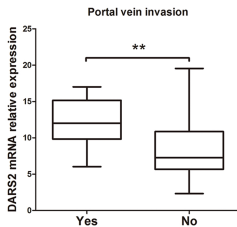

Supplement: MOESM3 [file 15146994]
